# Supplementary material for: Selective electroreduction of CO2 into CO over Ag and Cu decorated carbon nanoflakes
Source: Royal Society of Chemistry journal article supplement (doi:10.1039/d4ya00462k), 2024-01-01
Supplement: d4ya00462k1.pdf [file d4ya00462k1.pdf]

## Supporting Information

### Selective Electroreduction of CO<sub>2</sub> into CO over Ag and Cu Decorated Carbon Nanoflakes

Ahmad Faraz,<sup>1</sup> Waheed Iqbal,<sup>1</sup> Shayan Gul,<sup>1</sup> Fehmida Kanodarwala,<sup>2</sup> Muhammad Nadeem Zafar,<sup>3,4</sup> Guobao Xu<sup>4\*</sup> and Muhammad Arif Nadeem<sup>1,4\*</sup>

<sup>1</sup>Department of Chemistry, Quaid-i-Azam University, Islamabad 45320, Pakistan

<sup>2</sup>University of Technology Sydney, NSW, 2007, Sydney, Australia

<sup>3</sup>Department of Chemistry, University of Gujrat, 50700, Gujrat, Pakistan

<sup>4</sup>State Key Laboratory of Electroanalytical Chemistry, Changchun Institute of Applied Chemistry, Chinese Academy of Sciences, Changchun Jilin 130022, China

M.A.N; [manadeem@qau.edu.pk](mailto:manadeem@qau.edu.pk), +92-51-9064-2062

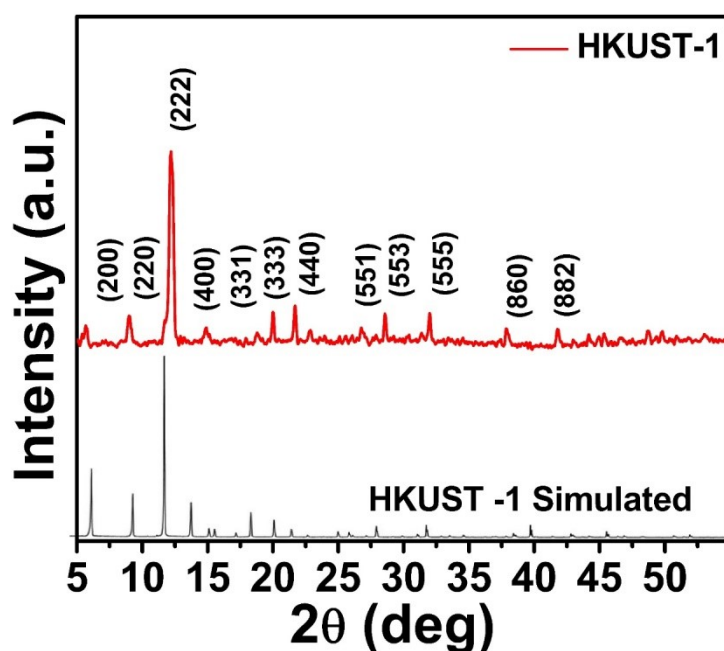

**Figure S 1:** XRD pattern of HKUST-1 along their simulated pattern

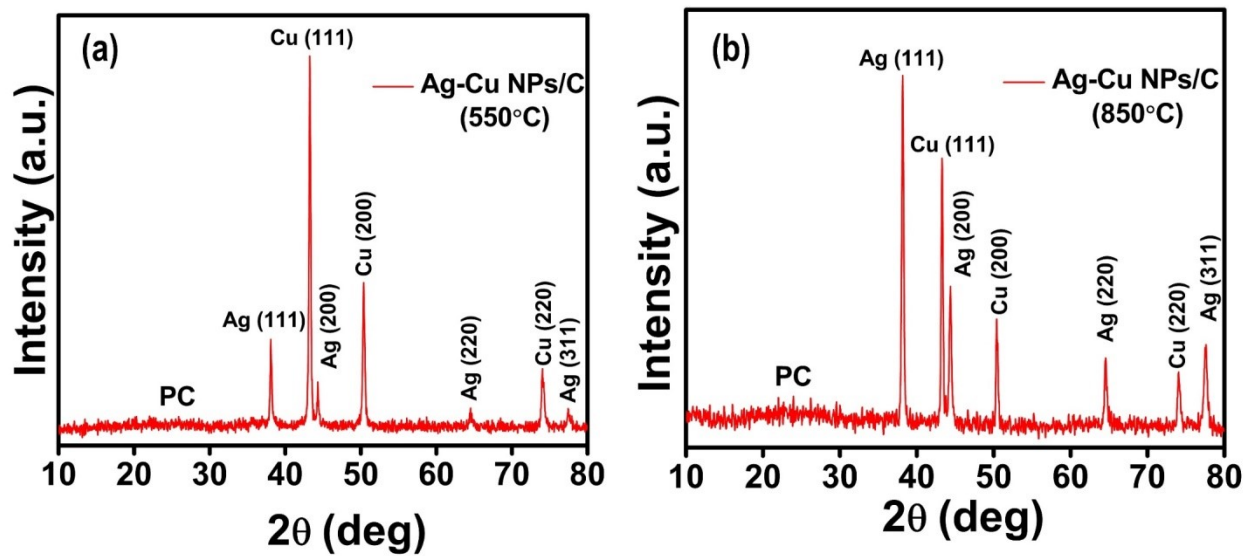

Figure S2: XRD of (a) Ag-Cu NPs/C (550°C) (b) Ag-Cu NPs/C (850 °C)

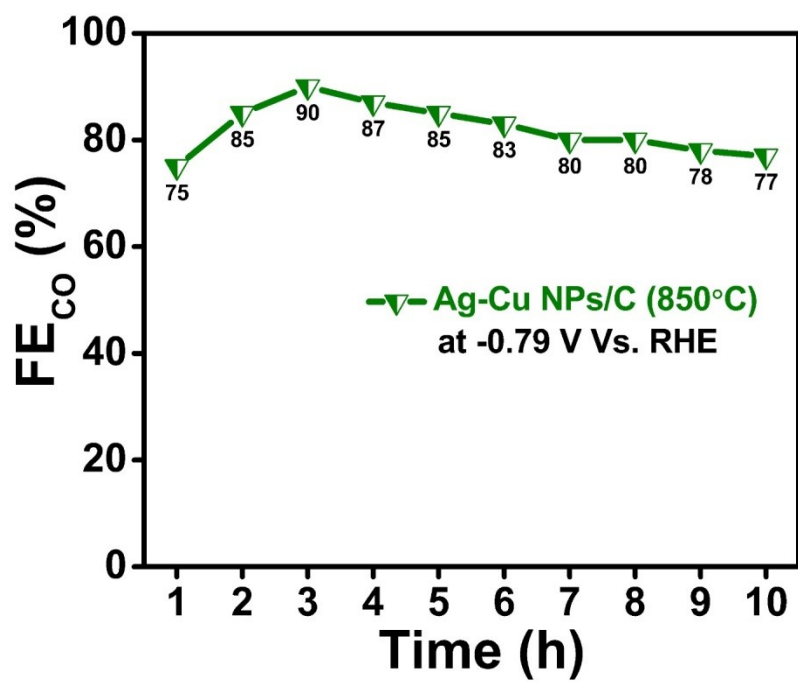

**Figure S3:** FE<sub>CO</sub>% of Ag-Cu NPs/C at a fixed potential of -0.79 V<sub>RHE</sub> for 10 h

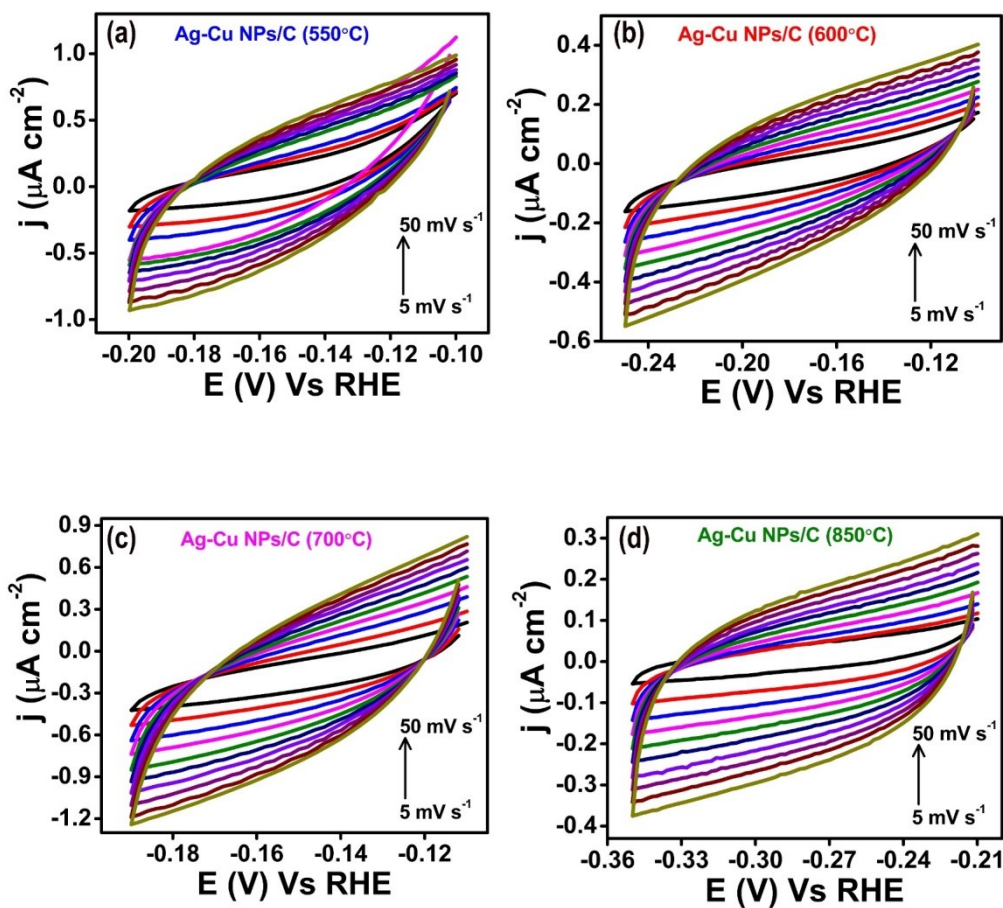

**Figure S4:** CV graphs in non-faradic regions of Ag-Cu NPs/C at different temperatures (a) 550°C (b) 600°C (c) 700°C (d) 850°C

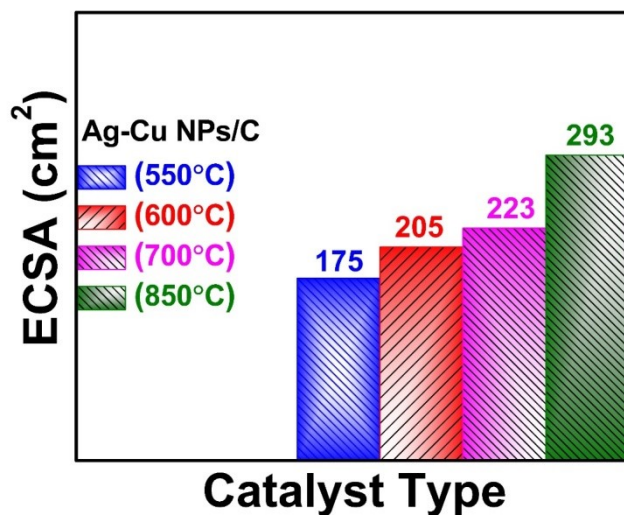

**Figure S5:** ECSA of Ag-Cu NPs/C at different temperatures.

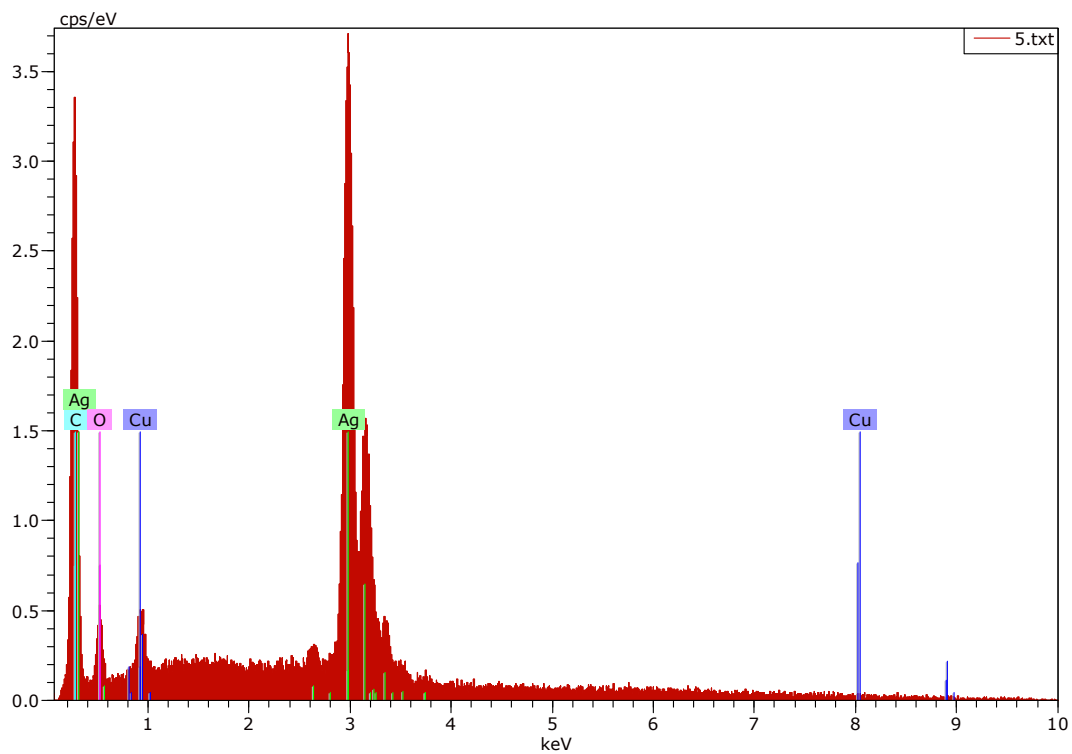

**Figure S6.** The edx spectrum of Ag-Cu NPs/C (850 °C)

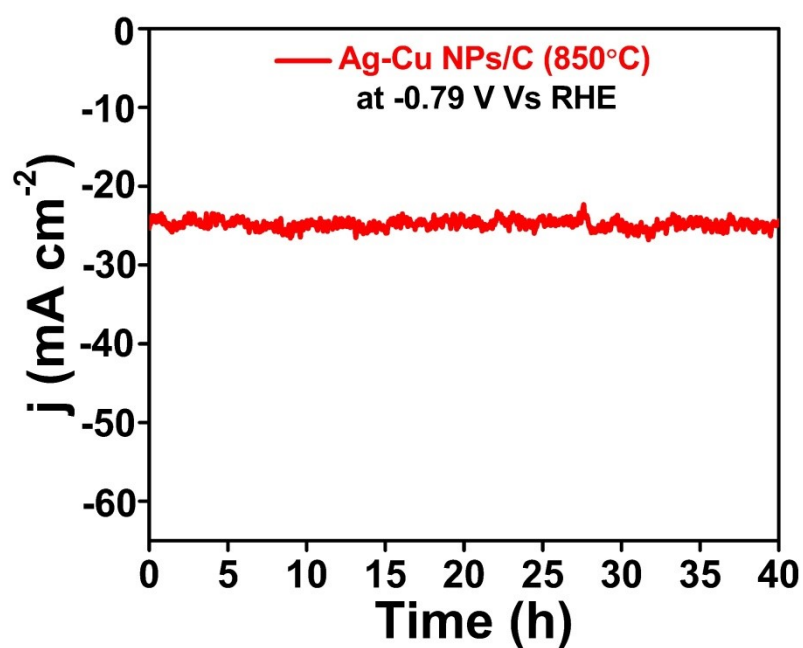

**Figure S7:** Long term stability of Ag-Cu NPs/C (850 °C) for 40 h at  $-0.79 V_{RHE}$ .
